# Supplementary material for: Synthesis, structure, surface photovoltage and magnetic properties of a novel 3D homochiral manganese phosphonate with right-handed helical chains
Source: Royal Society of Chemistry journal article supplement (doi:10.1039/c1ce05053b), 2011-01-01

# Synthesis, structure, and surface photovoltage and magnetic properties of a novel 3D homochiral manganese phosphonate with right-handed helical chains

Da-Peng Dong, Zhen-Gang Sun\*, Fei Tong, Yan-Yu Zhu, Kai Chen, Cheng-Qi Jiao, Cheng-Lin Wang, Chao Li and Wei-Nan Wang

Institute of Chemistry for Functionalized Materials, School of Chemistry and Chemical Engineering, Liaoning Normal University, Dalian 116029, P. R. China.

E-mail: szg188@163.com (Z. -G. Sun)

## Contents

- 1. Table S1** Crystal data and structure refinement for compound **1**.
- 2. Table S2** Selected bond lengths (Å) and bond angles (°) in compound **1**.
- 3. Figure S1** X-ray powder diffraction patterns of compound **1**.
- 4. Figure S2** TG curve of compound **1**.
- 5. Figure S3** IR spectrum of compound **1**.
- 6. Figure S4** The FISPS of compound **1**.

**Table S1.** Crystal data and structure refinement for compound **1**.

|                                                      |                                                                                |
|------------------------------------------------------|--------------------------------------------------------------------------------|
| Empirical formula                                    | C <sub>5</sub> H <sub>10</sub> Mn <sub>2</sub> NO <sub>12</sub> P <sub>2</sub> |
| Formula weight                                       | 447.96                                                                         |
| Temperature/K                                        | 295(2)                                                                         |
| Crystal system                                       | Tetragonal                                                                     |
| Space group                                          | <i>P</i> 4 <sub>2</sub>                                                        |
| <i>a</i> (Å)                                         | 14.791(4)                                                                      |
| <i>c</i> (Å)                                         | 5.696(3)                                                                       |
| <i>V</i> (Å <sup>3</sup> )                           | 1246.1(8)                                                                      |
| <i>Z</i>                                             | 4                                                                              |
| <i>D</i> <sub>c</sub> (g·cm <sup>-3</sup> )          | 2.388                                                                          |
| Absorption coefficient                               | 2.354                                                                          |
| Reflections collected                                | 8041                                                                           |
| Independent reflections                              | 2365 ( <i>R</i> <sub>int</sub> = 0.0501)                                       |
| Completeness to theta = 28.21                        | 98.7 %                                                                         |
| Goodness-of-fit on <i>F</i> <sup>2</sup>             | 1.045                                                                          |
| Final <i>R</i> indices [ <i>I</i> > 2σ ( <i>I</i> )] | <i>R</i> <sub>1</sub> = 0.0364, <i>wR</i> <sub>2</sub> = 0.0773                |
| <i>R</i> indices (all data)                          | <i>R</i> <sub>1</sub> = 0.0488, <i>wR</i> <sub>2</sub> = 0.0827                |
| Absolute structure parameter                         | -0.01(3)                                                                       |

$$R_1 = \sum (|F_0| - |F_C|) / \sum |F_0|; wR_2 = [\sum w (|F_0| - |F_C|)^2 / \sum w F_0^2]^{1/2}.$$

**Table S2** Selected bond lengths (Å) and bond angles (°) in compound **1**.

|                     |            |                       |            |
|---------------------|------------|-----------------------|------------|
| Mn(1)–O(5)#1        | 2.136(4)   | P(1)–O(1)             | 1.541(4)   |
| Mn(1)–O(2)          | 2.153(4)   | P(1)–O(2)             | 1.518(4)   |
| Mn(1)–O(7)          | 2.155(3)   | P(1)–O(3)             | 1.524(4)   |
| Mn(1)–O(6)#2        | 2.156(4)   | P(2)–O(7)             | 1.529(4)   |
| Mn(1)–O(3)#2        | 2.177(4)   | P(2)–O(8)             | 1.501(4)   |
| Mn(1)–O(4)#1        | 2.321(4)   | P(2)–O(9)             | 1.530(4)   |
| Mn(2)–O(8)          | 2.113(4)   | O(4)–C(1)             | 1.443(6)   |
| Mn(2)–O(7)#3        | 2.148(4)   | O(5)–C(2)             | 1.260(6)   |
| Mn(2)–O(12)#4       | 2.148(4)   | O(6)–C(2)             | 1.258(6)   |
| Mn(2)–O(3)          | 2.198(3)   | O(10)–C(3)            | 1.437(6)   |
| Mn(2)–O(11)#3       | 2.256(4)   | O(11)–C(4)            | 1.272(6)   |
| Mn(2)–O(10)#4       | 2.321(4)   | O(12)–C(4)            | 1.240(6)   |
| O(5)#1–Mn(1)–O(2)   | 87.18(14)  | O(8)–Mn(2)–O(7)#3     | 108.15(14) |
| O(5)#1–Mn(1)–O(7)   | 98.78(14)  | O(8)–Mn(2)–O(12)#4    | 87.36(14)  |
| O(2)–Mn(1)–O(7)     | 99.16(14)  | O(7)#3–Mn(2)–O(12)#4  | 164.44(14) |
| O(5)#1–Mn(1)–O(6)#2 | 95.21(14)  | O(8)–Mn(2)–O(3)       | 101.90(14) |
| O(2)–Mn(1)–O(6)#2   | 84.68(14)  | O(7)#3–Mn(2)–O(3)     | 77.37(13)  |
| O(7)–Mn(1)–O(6)#2   | 165.65(14) | O(12)#4–Mn(2)–O(3)    | 101.18(14) |
| O(5)#1–Mn(1)–O(3)#2 | 169.38(14) | O(8)–Mn(2)–O(11)#3    | 81.39(13)  |
| O(2)–Mn(1)–O(3)#2   | 103.22(13) | O(7)#3–Mn(2)–O(11)#3  | 86.26(13)  |
| O(7)–Mn(1)–O(3)#2   | 77.68(13)  | O(12)#4–Mn(2)–O(11)#3 | 95.06(15)  |
| O(6)#2–Mn(1)–O(3)#2 | 87.98(13)  | O(3)–Mn(2)–O(11)#3    | 163.54(13) |
| O(5)#1–Mn(1)–O(4)#1 | 70.72(13)  | O(8)–Mn(2)–O(10)#4    | 151.71(13) |
| O(2)–Mn(1)–O(4)#1   | 156.57(13) | O(7)#3–Mn(2)–O(10)#4  | 94.87(13)  |
| O(7)–Mn(1)–O(4)#1   | 92.02(14)  | O(12)#4–Mn(2)–O(10)#4 | 69.92(14)  |
| O(6)#2–Mn(1)–O(4)#1 | 89.56(14)  | O(3)–Mn(2)–O(10)#4    | 98.97(13)  |
| O(3)#2–Mn(1)–O(4)#1 | 99.24(14)  | O(11)#3–Mn(2)–O(10)#4 | 84.01(13)  |

Symmetry transformations used to generate equivalent atoms:

#1  $-y+1, x, z+1/2$     #2  $x, y, z+1$     #3  $x, y, z-1$     #4  $-y+2, x, z-1/2$

**Figure S1** X-ray powder diffraction patterns of compound **1**. Simulated (lower trace) and experimental (upper trace).

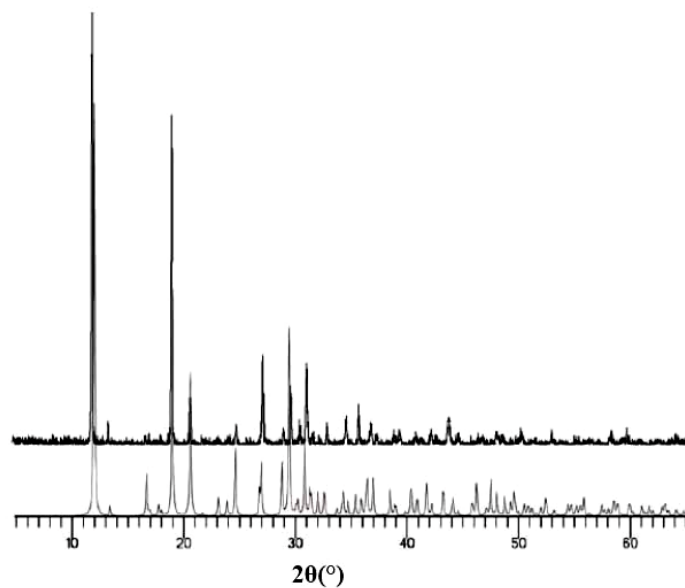

**Figure S2** TG curve of compound **1**.

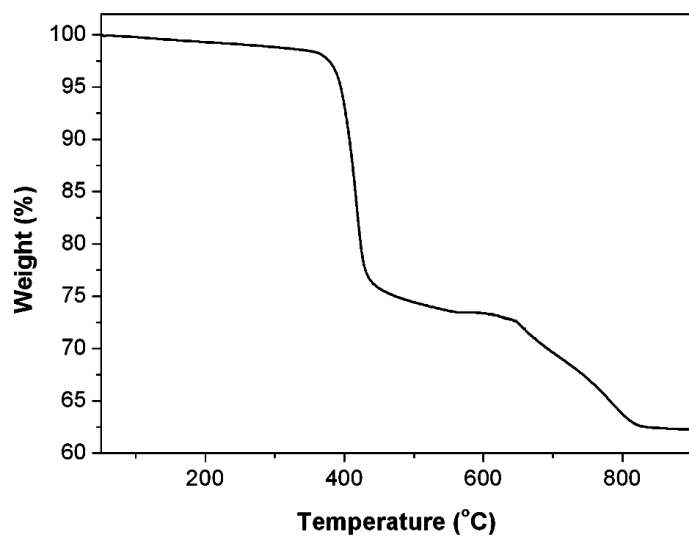

**Figure S3** IR spectrum of compound **1**.

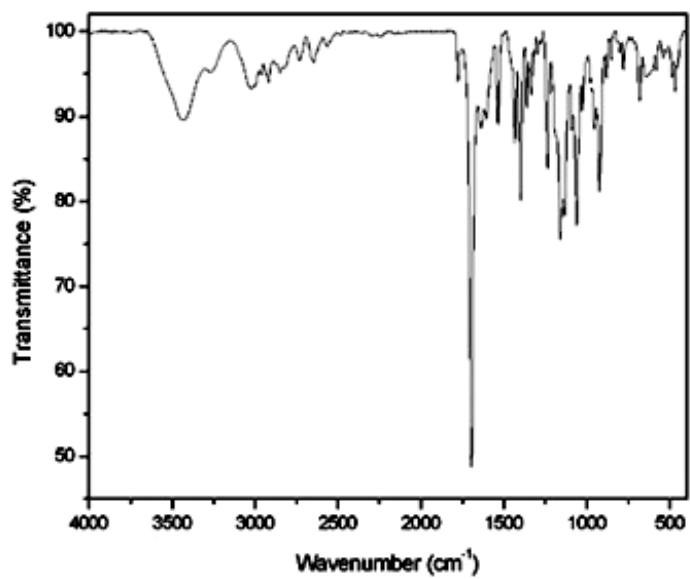

**Figure S4** The FISPS of compound **1**. The intensities of the SPV response increase linearly with the external positive electric field.

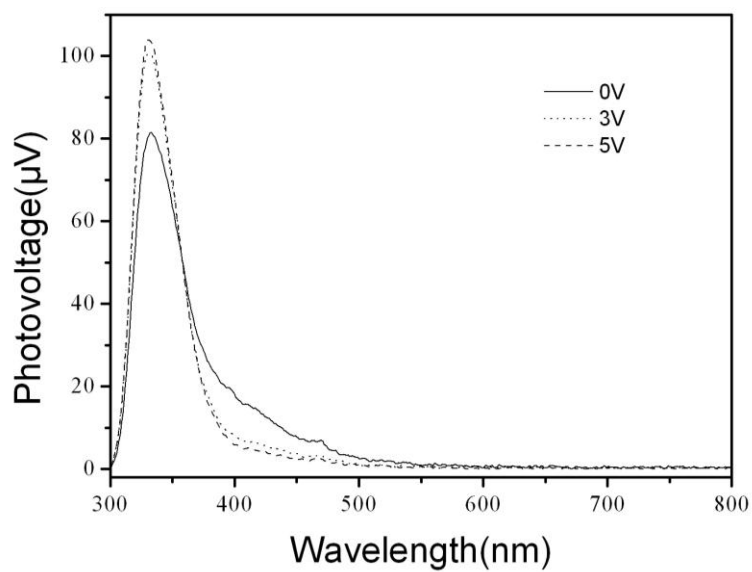

Supplement: c1ce05053b.pdf [file c1ce05053b.pdf]
